# Supplementary material
Source: PubMed Central journal article supplement (PMC5484733)
Supplement: NIHMS867112-supplement-1.pdf [file NIHMS867112-supplement-1.pdf]

# Sorting and IFNG expression of CD4<sup>+</sup> T cells stimulated with IL12/IL18/TL1A

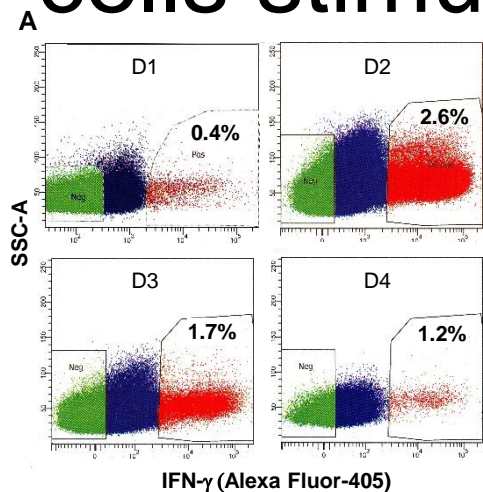

Fig. S1. Sorting and IFNG expression of CD4<sup>+</sup> T cells. A, Histograms of side scatter vs. IFN- $\gamma$  for CD4<sup>+</sup> T cells stimulated with recombinant human IL-12 (500 pg/ml) and IL-18 (50 ng/ml) and TL1A (100 ng/ml) for 8 h from 4 donor (D1-4); B, IFNG expression of producing and non-producing CD4<sup>+</sup> T cells; C, dendrogram of hierarchical clustering using centered correlation and average linkage.

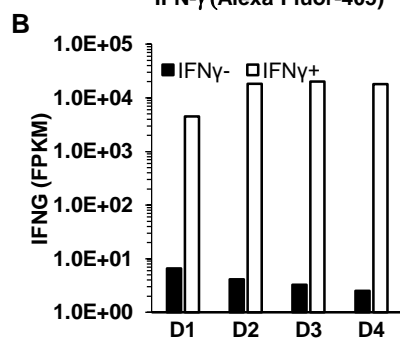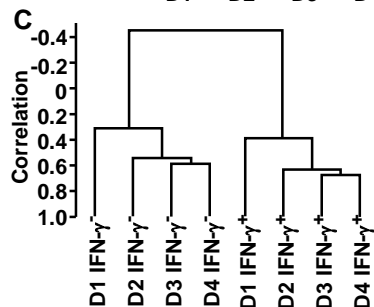

Figure S1
