# Supplementary material
Source: PubMed Central journal article supplement (PMC5484733)
Supplement: NIHMS867112-supplement-3.pdf [file NIHMS867112-supplement-3.pdf]

# Clinical disease parameters associated with *RNASSET2* disease-risk variants

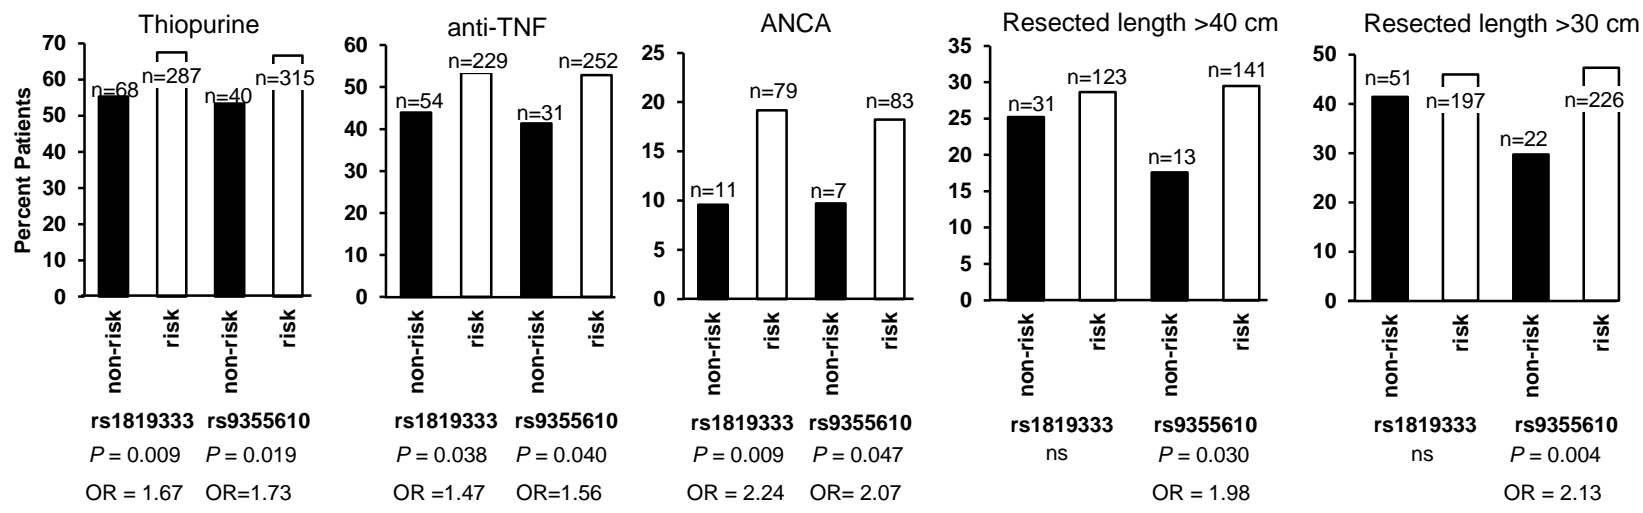

Fig S3. Association of *RNASSET2* disease risk variant SNPs at the time of surgery with therapeutic failure of thiopurine or anti-TNF therapy, ANCA sero-positivity and an increased length of intestinal resection (data summarized in Table 1).
