# Supplementary material
Source: PubMed Central journal article supplement (PMC5484733)
Supplement: NIHMS867112-supplement-4.pdf [file NIHMS867112-supplement-4.pdf]

# Association of *RNASSET2* disease-risk SNPs with a more severe disease recurrence

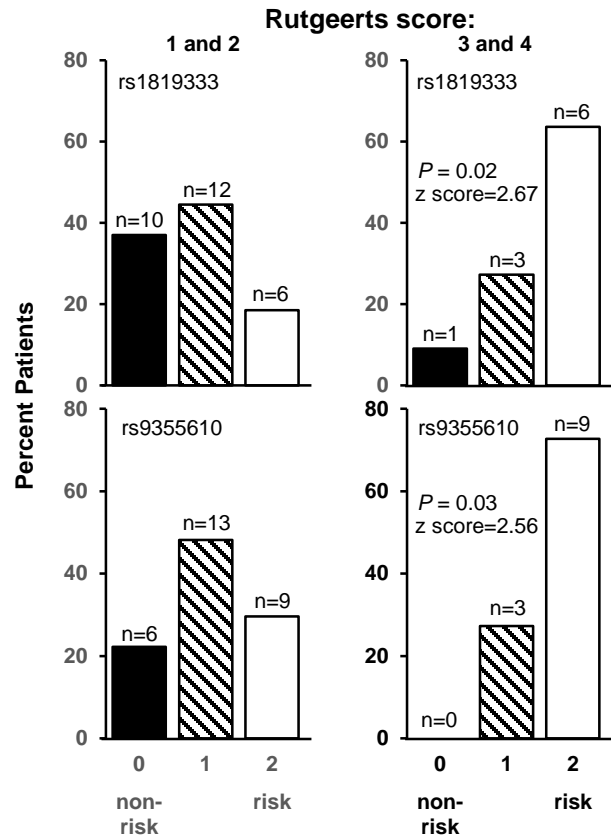

Fig. S4. Association of *RNASSET2* disease risk variant SNPs with disease recurrence in 38 patients who were not receiving postoperative prophylaxis. Post-operative endoscopies were performed and Rutgeerts scores were assigned. (data summarized in Table 1).
