# Supplementary material
Source: PubMed Central journal article supplement (PMC5484733)
Supplement: NIHMS867112-supplement-5.pdf [file NIHMS867112-supplement-5.pdf]

# Tissue-specific functional annotation of *RNASET2* locus

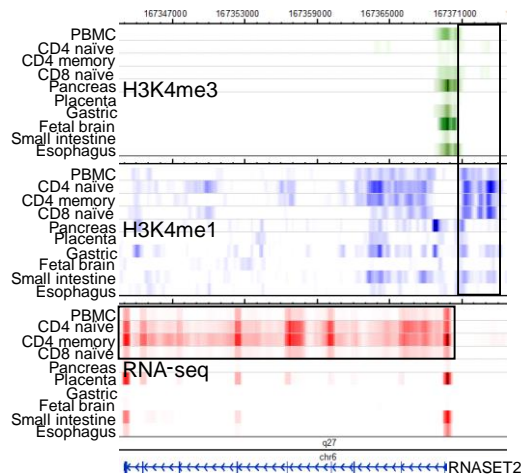

Fig. S5. Tissue-specific functional annotation of *RNASET2* locus. Heatmap of H3K4me3, H3K4me1 and RNAseq data from REMC
