# Supplementary material
Source: PubMed Central journal article supplement (PMC5484733)
Supplement: NIHMS867112-supplement-7.pdf [file NIHMS867112-supplement-7.pdf]

# siRNA silencing of *RNASET2* expression enhances IFNG secretion

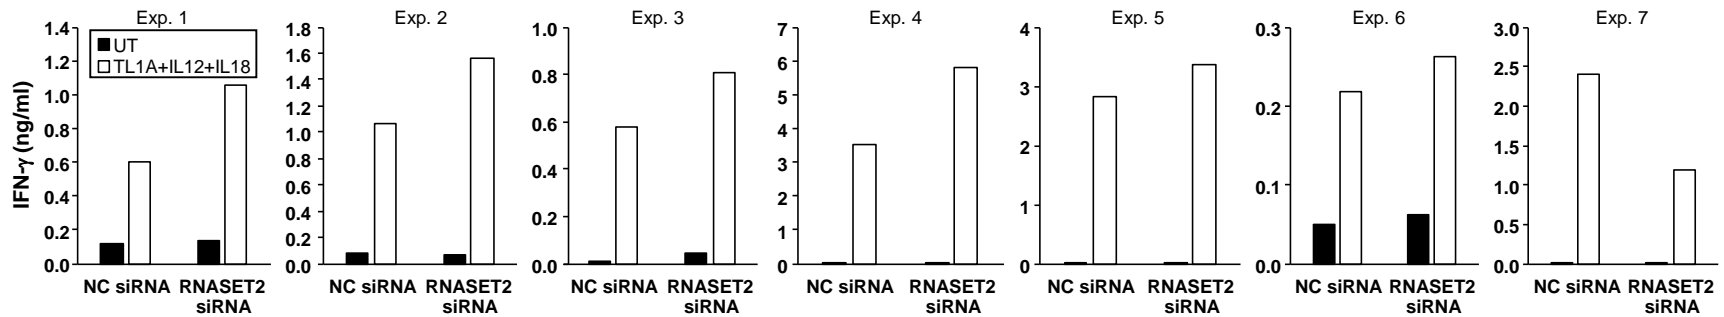

Fig. S7. Effect of *RNASET2* silencing on IFNG secretion. Inhibition of *RNASET2* expression by *RNASET2*-specific siRNA was greater than 50% in all experiments.
