# Supplementary material
Source: PubMed Central journal article supplement (PMC5484733)
Supplement: NIHMS867112-supplement-8.pdf [file NIHMS867112-supplement-8.pdf]

# Proteomic analysis following siRNA silencing of *RNASET2*

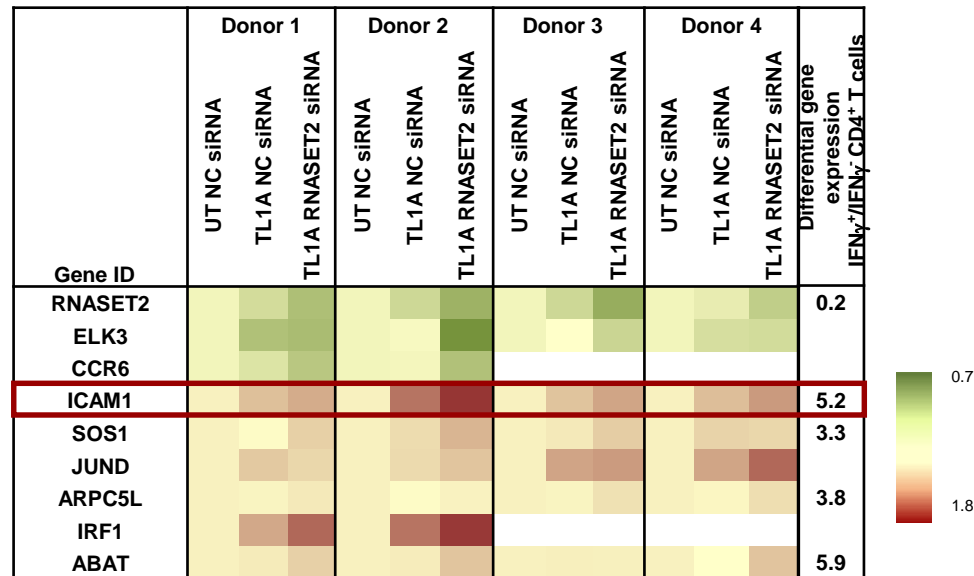

Fig. S8. Heat-map illustrating protein expression of indicated genes in CD4<sup>+</sup> T cells relative to untreated cells following silencing with control (NC) or *RNASET2* siRNA. Results are from 4 healthy donors. The right column depicts differential gene expression in IFN- $\gamma$  secreting compared to non- secreting CD4<sup>+</sup> T cells.
